# Supplementary material
Source: publisher site journal article supplement (https://static.cambridge.org/content/id/urn:cambridge.org:id:article:S1355617720000429/resource/name/S1355617720000429supp001.docx)
Supplement: Supplementary file 1 [file S1355617720000429supp001.docx]

**Supplementary Material**

**Procedure: Order of Tests**

|  | Approximate timing |
| --- | --- |
| Informed consent | 5 |
| Demographic and health background form | 15 |
| 1. BVMT-R – Immediate recall (Form 1; Benedict, 1997) | 5 |
| 1. *Face-name memory task – Learning and immediate cued recall* | 15 |
| 1. Consonant trigrams (Stuss, Stethem, & Pelchat, 1988) | 10 |
| 1. BVMT-R – Delayed recall and recognition | 5 |
| 1. *1-back task* | 8 |
| 1. WAIS-III Digit span (Wechsler, 1997) | 5 |
| 1. HADS (Zigmond & Snaith, 1983) | 5 |
| 1. *Face-name memory task – Delayed cued recall and recognition* | 12 |
| 1. Awareness questionnaire | 3 |
| 1. WAIS-III Digit Symbol Coding & Incidental Learning (Wechsler, 1997) | 5 |
| 1. MoCA (Nasreddine et al., 2005) | 10 |
| 1. Shipley-2 Vocabulary (Shipley et al., 2009) | 10 |
| 1. Memory for faces questionnaire | 5 |
| Debriefing & compensation | 5 |

**Supplementary Material: References**

Benedict, R. H. (1997). *Brief visuospatial memory test—revised. Professional manual.* Lutz, FL: Psychological Assessment Resources, Inc.

Nasreddine, Z. S., Phillips, N. A., Bedirian, V., Charbonneau, S., Whitehead, V., Collin, I., … Chertkow, H. (2005). The Montreal Cognitive Assessment, MoCA: A brief screening. *Journal of the American Geriatrics Society*, *53*, 695–699.

Shipley, W. C., Gruber, C. P., Martin, T. A., & Klein, A. M. (2009). *Shipley-2 manual*. Los Angeles, CA: Western Psychological Services.

Stuss, D. T., Stethem, L. L., & Pelchat, G. (1988). Three tests of attention and rapid information processing: An extension. *Clinical Neuropsychologist*, *2*(3), 246–250. https://doi.org/10.1080/13854048808520107

Wechsler, D. (1997). WAIS‐III administration and scoring manual. *The Psychological Corporation, San Antonio, TX*. https://doi.org/10.1177/1073191102009001003

Zigmond, A. S., & Snaith, R. P. (1983). The hospital anxiety and depression scale. *Acta Psychiatrica Scandinavica*, *67*(6), 361–370. https://doi.org/10.1111/j.1600-0447.1983.tb09716.x
